# Supplementary material for: Magnetic rod-like MIL-88B(Fe)/CoFe2O4 metal–organic framework decorated with Bi2O2CO3 nanoparticles for efficient catalytic reduction of toxic nitrophenols
Source: Royal Society of Chemistry journal article supplement (doi:10.1039/d4ce00591k), 2024-01-01
Supplement: d4ce00591k1.pdf [file d4ce00591k1.pdf]

## Supplementary Information (SI)

### **Magnetic rod-like MIL-88B(Fe)/CoFe<sub>2</sub>O<sub>4</sub> metal-organic framework decorated with Bi<sub>2</sub>O<sub>2</sub>CO<sub>3</sub> nanoparticles for efficient catalytic reduction of toxic nitrophenols**

Nasrin Rahnama,<sup>a</sup> Saeed Farhadi<sup>\*a</sup> and Farzaneh Mahmoudi<sup>b</sup>

<sup>a</sup> Department of Inorganic Chemistry, Faculty of Chemistry, Lorestan University, Khorramabad, 68151-44316, Iran

<sup>b</sup> Department of Chemistry, University of Miami, Coral Gables, Florida 33146, United States

\*Corresponding author: Tel: +986633120611, fax: +986633120618.

Email addresses: [farhadi.s@lu.ac.ir](mailto:farhadi.s@lu.ac.ir); [sfarhadi1348@yahoo.com](mailto:sfarhadi1348@yahoo.com) (S. Farhadi)

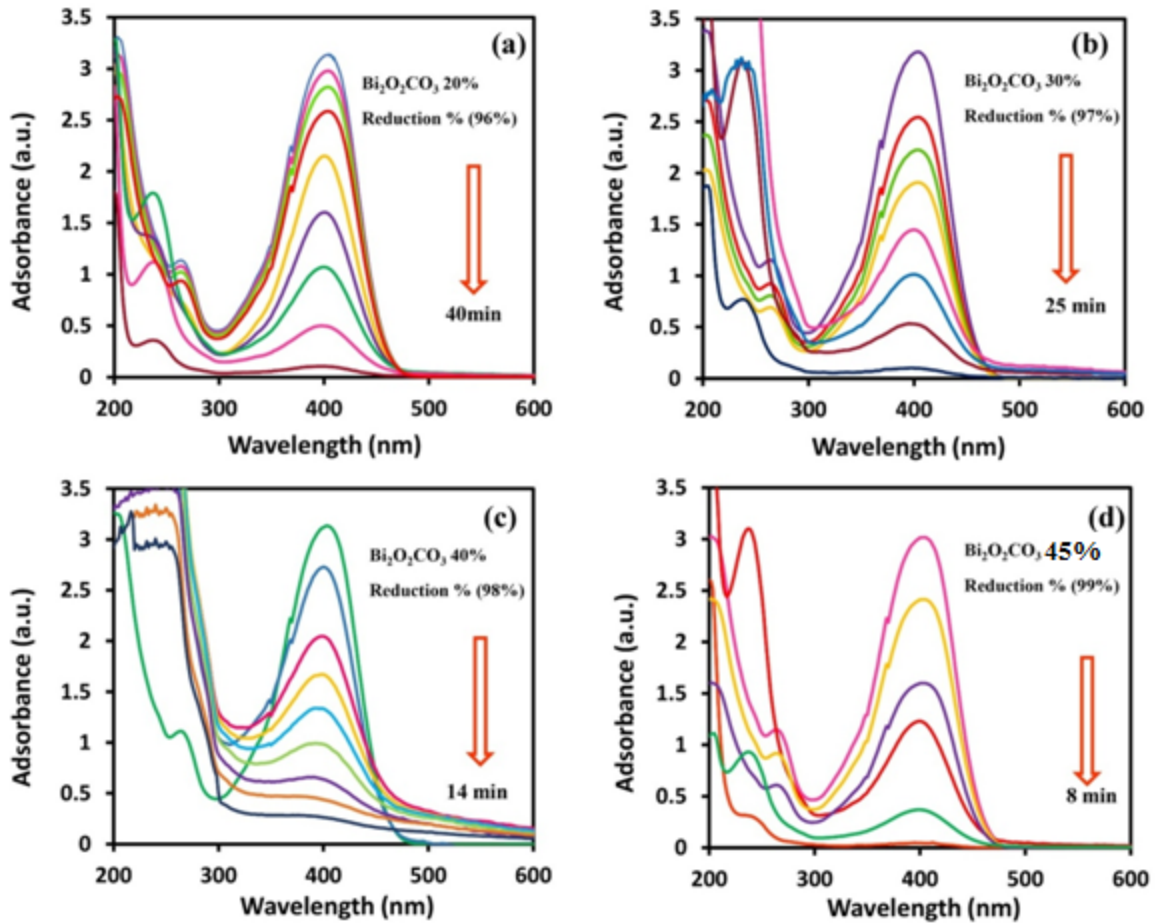

**Fig. 1S.** UV-Vis absorption spectra change for the reduction process of 4-NP with different percentages of  $\text{Bi}_2\text{O}_2\text{CO}_3$  in catalyst: (a) 20%, (b) 30%, (c), 40% and (d) 45%. Condition : 4-NP (2 mL, 0.2 mM),  $\text{NaBH}_4$  (0.5 mL, 20 mM) and catalyst (3 mg).
